# Supplementary material
Source: publisher figshare collection journal article supplement (https://gsajournals.figshare.com/ndownloader/files/24316937)
Supplement: Supplementary file 1 [file 24316937]

## Sheet: Process
Table S2: Additional GO enrichment data for ORFs enriched in New Zealand S. cerevisiase. See worksheets for Process, Function and Component GO terms.
GO Term	Description	P-value	FDR q-value	Enrichment	N	B	n	b	Genes
GO:0015750	pentose transmembrane transport	1.8e-06	0.00944	95.53	5859	4	46	3	[HXT4 - hxt4p, HXT7 - hxt7p, HXT1 - hxt1p]
GO:0015761	mannose transmembrane transport	5.65e-06	0.0148	31.84	5859	16	46	4	[HXT16 - hxt16p, HXT4 - hxt4p, HXT7 - hxt7p, HXT1 - hxt1p]
GO:0098704	carbohydrate import across plasma membrane	7.35e-06	0.0128	29.97	5859	17	46	4	[HXT16 - hxt16p, HXT4 - hxt4p, HXT7 - hxt7p, HXT1 - hxt1p]
GO:0015755	fructose transmembrane transport	9.39e-06	0.0123	28.3	5859	18	46	4	[HXT16 - hxt16p, HXT4 - hxt4p, HXT7 - hxt7p, HXT1 - hxt1p]
GO:0098739	import across plasma membrane	5.12e-05	0.0536	18.87	5859	27	46	4	[HXT16 - hxt16p, HXT4 - hxt4p, HXT7 - hxt7p, HXT1 - hxt1p]
GO:0019482	beta-alanine metabolic process	6.03e-05	0.0527	127.37	5859	2	46	2	[ALD3 - aldehyde dehydrogenase (nad(+)) ald3, ALD2 - aldehyde dehydrogenase (nad(+)) ald2]
GO:0019483	beta-alanine biosynthetic process	6.03e-05	0.0451	127.37	5859	2	46	2	[ALD3 - aldehyde dehydrogenase (nad(+)) ald3, ALD2 - aldehyde dehydrogenase (nad(+)) ald2]
GO:0046323	glucose import	0.000102	0.0667	15.92	5859	32	46	4	[HXT16 - hxt16p, HXT4 - hxt4p, HXT7 - hxt7p, HXT1 - hxt1p]
GO:0008645	hexose transmembrane transport	0.000115	0.0671	15.44	5859	33	46	4	[HXT16 - hxt16p, HXT4 - hxt4p, HXT7 - hxt7p, HXT1 - hxt1p]
GO:1904659	glucose transmembrane transport	0.000115	0.0604	15.44	5859	33	46	4	[HXT16 - hxt16p, HXT4 - hxt4p, HXT7 - hxt7p, HXT1 - hxt1p]
GO:0015749	monosaccharide transmembrane transport	0.000115	0.0549	15.44	5859	33	46	4	[HXT16 - hxt16p, HXT4 - hxt4p, HXT7 - hxt7p, HXT1 - hxt1p]
GO:0034219	carbohydrate transmembrane transport	0.00013	0.0567	14.98	5859	34	46	4	[HXT16 - hxt16p, HXT4 - hxt4p, HXT7 - hxt7p, HXT1 - hxt1p]
GO:0006598	polyamine catabolic process	0.00018	0.0726	84.91	5859	3	46	2	[ALD3 - aldehyde dehydrogenase (nad(+)) ald3, ALD2 - aldehyde dehydrogenase (nad(+)) ald2]
GO:0008643	carbohydrate transport	0.000359	0.134	11.58	5859	44	46	4	[HXT16 - hxt16p, HXT4 - hxt4p, HXT7 - hxt7p, HXT1 - hxt1p]

## Sheet: Function
GO Term	Description	P-value	FDR q-value	Enrichment	N	B	n	b	Genes
GO:0015146	pentose transmembrane transporter activity	1.8e-06	0.00457	95.53	5859	4	46	3	[HXT4 - hxt4p, HXT7 - hxt7p, HXT1 - hxt1p]
GO:0015578	mannose transmembrane transporter activity	4.26e-06	0.00541	33.97	5859	15	46	4	[HXT16 - hxt16p, HXT4 - hxt4p, HXT7 - hxt7p, HXT1 - hxt1p]
GO:0005353	fructose transmembrane transporter activity	4.26e-06	0.00361	33.97	5859	15	46	4	[HXT16 - hxt16p, HXT4 - hxt4p, HXT7 - hxt7p, HXT1 - hxt1p]
GO:0005355	glucose transmembrane transporter activity	5.65e-06	0.00359	31.84	5859	16	46	4	[HXT16 - hxt16p, HXT4 - hxt4p, HXT7 - hxt7p, HXT1 - hxt1p]
GO:0015145	monosaccharide transmembrane transporter activity	7.35e-06	0.00373	29.97	5859	17	46	4	[HXT16 - hxt16p, HXT4 - hxt4p, HXT7 - hxt7p, HXT1 - hxt1p]
GO:0015149	hexose transmembrane transporter activity	7.35e-06	0.00311	29.97	5859	17	46	4	[HXT16 - hxt16p, HXT4 - hxt4p, HXT7 - hxt7p, HXT1 - hxt1p]
GO:0051119	sugar transmembrane transporter activity	9.39e-06	0.00341	28.3	5859	18	46	4	[HXT16 - hxt16p, HXT4 - hxt4p, HXT7 - hxt7p, HXT1 - hxt1p]
GO:1904408	melatonin binding	3.68e-05	0.0117	42.46	5859	9	46	3	[ENO1 - phosphopyruvate hydratase eno1, ENO2 - phosphopyruvate hydratase eno2, ADH1 - alcohol dehydrogenase adh1]
GO:0042562	hormone binding	3.68e-05	0.0104	42.46	5859	9	46	3	[ENO1 - phosphopyruvate hydratase eno1, ENO2 - phosphopyruvate hydratase eno2, ADH1 - alcohol dehydrogenase adh1]
GO:0005402	carbohydrate:cation symporter activity	3.73e-05	0.00947	20.38	5859	25	46	4	[HXT16 - hxt16p, HXT4 - hxt4p, HXT7 - hxt7p, HXT1 - hxt1p]
GO:0005351	carbohydrate:proton symporter activity	3.73e-05	0.00861	20.38	5859	25	46	4	[HXT16 - hxt16p, HXT4 - hxt4p, HXT7 - hxt7p, HXT1 - hxt1p]
GO:0015144	carbohydrate transmembrane transporter activity	5.93e-05	0.0126	18.2	5859	28	46	4	[HXT16 - hxt16p, HXT4 - hxt4p, HXT7 - hxt7p, HXT1 - hxt1p]
GO:0033218	amide binding	0.000111	0.0216	10.27	5859	62	46	5	[ENO1 - phosphopyruvate hydratase eno1, CPR1 - peptidylprolyl isomerase cpr1, ENO2 - phosphopyruvate hydratase eno2, VTH2 - vth2p, ADH1 - alcohol dehydrogenase adh1]
GO:0043878	glyceraldehyde-3-phosphate dehydrogenase (NAD+) (non-phosphorylating) activity	0.00018	0.0326	84.91	5859	3	46	2	[ALD3 - aldehyde dehydrogenase (nad(+)) ald3, ALD2 - aldehyde dehydrogenase (nad(+)) ald2]
GO:0015295	solute:proton symporter activity	0.000182	0.0308	13.77	5859	37	46	4	[HXT16 - hxt16p, HXT4 - hxt4p, HXT7 - hxt7p, HXT1 - hxt1p]
GO:0005199	structural constituent of cell wall	0.000182	0.0288	13.77	5859	37	46	4	[TIR4 - tir4p, TIR1 - tir1p, TIP1 - tip1p, HSP150 - hsp150p]
GO:0015294	solute:cation symporter activity	0.000247	0.0369	12.74	5859	40	46	4	[HXT16 - hxt16p, HXT4 - hxt4p, HXT7 - hxt7p, HXT1 - hxt1p]
GO:0004634	phosphopyruvate hydratase activity	0.000358	0.0505	63.68	5859	4	46	2	[ENO1 - phosphopyruvate hydratase eno1, ENO2 - phosphopyruvate hydratase eno2]
GO:0015293	symporter activity	0.000427	0.057	11.08	5859	46	46	4	[HXT16 - hxt16p, HXT4 - hxt4p, HXT7 - hxt7p, HXT1 - hxt1p]

## Sheet: Component
GO Term	Description	P-value	FDR q-value	Enrichment	N	B	n	b	Genes
GO:0071944	cell periphery	0.000237	0.254	4.15	5859	276	46	9	[TIR4 - tir4p, PHO5 - pho5p, HXT16 - hxt16p, HXT4 - hxt4p, TIR1 - tir1p, HXT7 - hxt7p, TIP1 - tip1p, HXT1 - hxt1p, YFL051C - hypothetical protein]
GO:0009277	fungal-type cell wall	0.000342	0.183	6.26	5859	122	46	6	[TIR4 - tir4p, PHO5 - pho5p, PHO3 - pho3p, TIR1 - tir1p, TIP1 - tip1p, HSP150 - hsp150p]
GO:0000015	phosphopyruvate hydratase complex	0.000358	0.128	63.68	5859	4	46	2	[ENO1 - phosphopyruvate hydratase eno1, ENO2 - phosphopyruvate hydratase eno2]
GO:0030312	external encapsulating structure	0.000442	0.118	5.97	5859	128	46	6	[TIR4 - tir4p, PHO5 - pho5p, PHO3 - pho3p, TIR1 - tir1p, TIP1 - tip1p, HSP150 - hsp150p]
GO:0005618	cell wall	0.000442	0.0947	5.97	5859	128	46	6	[TIR4 - tir4p, PHO5 - pho5p, PHO3 - pho3p, TIR1 - tir1p, TIP1 - tip1p, HSP150 - hsp150p]
